# Supplementary material for: The status and challenges of online consultation service in Internet hospitals operated by physical hospitals in China: A large-scale pooled analysis of multicenter data
Source: Research Square preprint supplement (doi:10.21203/rs.3.rs-5232766/v1), 2025-03-31
Supplement: Supplementary file 1 [file 2a0c6ac822faa6c361cd251d.docx]

|  | **Province/Municipality** | **Ownership** | **Type** |
| --- | --- | --- | --- |
| 1 | Anhui | Public | Traditional Chinese medical hospital |
| 2 | Anhui | Public | General hospital |
| 3 | Anhui | Public | General hospital |
| 4 | Anhui | Public | General hospital |
| 5 | Anhui | Public | General hospital |
| 6 | Fujian | Public | Women and children's hospital |
| 7 | Fujian | Public | General hospital |
| 8 | Fujian | Public | General hospital |
| 9 | Fujian | Public | General hospital |
| 10 | Fujian | Public | General hospital |
| 11 | Fujian | Public | General hospital |
| 12 | Fujian | Public | General hospital |
| 13 | Fujian | Public | Traditional Chinese medical hospital |
| 14 | Fujian | Public | General hospital |
| 15 | Fujian | Public | Mental hospital |
| 16 | Guangdong | Private | General hospital |
| 17 | Guangdong | Public | Traditional Chinese medical hospital |
| 18 | Guangxi | Public | General hospital |
| 19 | Guangxi | Public | Traditional Chinese medical hospital |
| 20 | Henan | Public | General hospital |
| 21 | Henan | Public | General hospital |
| 22 | Inner Mongolia | Public | General hospital |
| 23 | Liaoning | Public | General hospital |
| 24 | Ningxia | Private | General hospital |
| 25 | Shanghai | Public | Mental hospital |
| 26 | Tianjin | Public | General hospital |
| 27 | Tianjin | Public | Traditional Chinese medical hospital |
| 28 | Xinjiang | Public | General hospital |
| 29 | Xinjiang | Public | General hospital |
| 30 | Xinjiang | Public | General hospital |

**Appendix Table 1** The province, ownership and types of the physical hospitals that the Internet hospitals operated.
